1 Title Page

2

3

4

5

6

***Prevalence and factors associated with post-partum  
depression in a remote area of Cameroon: a cross-sectional  
study***

8

9

10 Therence Nwana Dingana<sup>1,2</sup>, Stewart Ndutard Ngasa<sup>1,3\*</sup>, Neh Chang Ngasa<sup>1,4</sup>, Leticia Armelle Sani

11 Tchouda<sup>1,4</sup>, Christabel Abanda<sup>1,5</sup>, Juste Niba<sup>1</sup>, Bill Erich Mbanyor<sup>1</sup>, Eric Wah Sanji<sup>1 ¶</sup>, Carlson-Sama

12 Babila<sup>1,6 ¶</sup>

13 1. Medical Research and Careers Organisation

14 2. Tubah District Hospital, Regional Delegation of Public Health, Northwest Region,  
15 Cameroon

16 3. Manchester University NHS Foundation Trust, Manchester, United Kingdom

17 4. Faculty of Health Sciences, University of Buea, Buea, Southwest Region, Cameroon

18 5. Laquintinie Hospital Douala, Douala, Littoral Region, Cameroon

19 6. Nuffield Health Hospitals, The Royal Leamington Spa, Warwickshire, United Kingdom.

20

21 \* Corresponding author

22 Email: [stewart.ndutard3@gmail.com](mailto:stewart.ndutard3@gmail.com) (SN)

23 ¶ These authors contributed equally to this work.

24

25

## 26 **Abstract**

27           Postpartum depression is one of the many challenges associated with childbirth. In  
28 Cameroon, the focus is more on postpartum obstetric complications resulting in underdiagnosis  
29 and misdiagnosis of this condition. The current socio-political crisis plaguing the English-speaking  
30 part of Cameroon has increased the stressors that may inherently increase the prevalence. There  
31 is no published data describing post-partum depression in a rural setting in Cameroon. We seek  
32 to determine the prevalence and factors associated with PPD in women attending the Tubah  
33 District hospital, North West Region, Cameroon. We conducted a cross-sectional hospital-based  
34 study at the Tubah District Hospital. A consecutive convenience sampling technique was used to  
35 recruit participants. Our main outcome was post-partum depression which was assessed using  
36 the Edinburgh Post-partum Depression Scale. A total of 207 post-partum women took part in this  
37 study with a mean age of  $27.54 \pm 5.78$  years. The prevalence of depression was 31.8%. Gender-  
38 based violence (OR: 4.67,  $P = 0.013$ ), financial stress (OR:3.57,  $P = 0.002$ ) and male baby (OR: 2.83,  
39  $P < 0.001$ ) were independent psychosocial factors associated with PPD. Independent psycho-  
40 clinical factors of post-partum depression include family history of mental health illness (OR:  
41 4.34,  $P = 0.04$ ) and previous history of depression (OR: 4.17,  $P = 0.02$ ). The prevalence of post-  
42 partum depression in women attending the Tubah District Hospital, Northwest Region,  
43 Cameroon is high. The factors associated with PPD are many. Identification of risk factors, early  
44 diagnosis and proper management can prevent PPD, disabling morbidity, and suicide in mothers.

45

46 **Keywords:** Post-partum depression, Cameroon, Rural, Tubah, District

47

## 48 Introduction

49 Bringing a child into the world is the joy of most women. However, many challenges are  
50 associated with childbirth some of which are not given appropriate attention. Amongst these is  
51 postpartum depression. Postpartum depression (PPD) is one of the mood disorders following  
52 childbirth and can develop into major depressive disorder [1,2]. Other postpartum mood  
53 disorders include baby blues and postpartum psychosis. The clinical features of PPD include  
54 anxiety, mood swings, low self-esteem, irritability, loss of appetite and lack of interest [1].  
55 Accurate diagnosis of PPD is difficult due to similarities in its presentation with other mood  
56 disorders [3].

57 PPD has a very huge public health burden as shown by its high global prevalence that  
58 ranges from 4 - 63.9% [3]. In Africa previous studies have also indicated this wide prevalence  
59 range. Amongst studies conducted across Africa, a prevalence of 50.4% was recorded in the  
60 Democratic Republic of Congo [4], 34.7% in South Africa[5], 23.4 in Nigeria [6] and 6.6 % in  
61 Uganda [7]. In Cameroon, Ndjoda et al recorded 23.4% in Yaoundé [8], while Ghogomu et al, in  
62 2016 recorded a very high prevalence of 61.8% in Limbe [9].

63 There are many associated factors of PPD; Gelaye et al and Stewart et al reported intimate  
64 partner violence, history of psychiatric illness, low maternal literacy levels, stress, early life abuse,  
65 anxiety, previous history of depression as predisposing factors [10,11]. In Cameroon,  
66 unemployment, unsatisfactory support of baby, marital issues, serious family problems,  
67 unplanned pregnancy, problems with baby feeding and sleep were recorded as associated factors  
68 [8,9]. Long-term negative effects can occur if PPD goes untreated. Some examples include major  
69 depression, cognitive, behavioural and physical effects which could reflect on the entire maternal  
70 family, mother and child bonding as well as child growth and development [11,12].

71 In sub-Saharan Africa, the focus has been more on postpartum obstetric complications  
72 and this has caused many cases of PPD to go undiagnosed and underreported, hence increasing  
73 the probability of having long term complications. Despite the magnitude of PPD, very few  
74 studies have been carried out in Cameroon. The previous studies in Cameroon were done in

75 urban settings. No previous study has been done to describe PPD in a rural setting, so we seek to  
76 determine the prevalence and factors associated with PPD in women attending the Tubah District  
77 Hospital (TDH), North West Region, Cameroon.

## 78 **Materials and methods**

### 79 **Study design, setting and participants**

80 We conducted a cross-sectional hospital-based study from July to September 2021 at the  
81 Tubah District Hospital. All participants were women who gave birth at the hospital. The Tubah  
82 Health District is one of the 19 health districts in the Northwest Region of Cameroon. There are  
83 13 health centres and one district hospital in the health district. The maternity of TDH carries out  
84 about 32 deliveries monthly. The activities of the maternity are run by 4 doctors, 3 midwives and  
85 6 nurses.

### 86 **Sampling and inclusion criteria**

87 A consecutive convenience sampling technique was used to recruit any woman who had  
88 given birth at the Tubah District Hospital. Women were recruited into the study 6 weeks after  
89 delivery at the post-natal clinic. Eligible participants who provided consent were recruited in the  
90 study. A structured questionnaire was administered to the participants by the duty midwives.  
91 The midwives had received adequate training on how to administer the questionnaire. We pre-  
92 tested our questionnaire on a group of 20 women prior to data collection. These women were  
93 excluded from the study. All poorly filled questionnaires were not included in the final analysis.

### 94 **Outcome variables**

95 Our main outcome was post-partum depression. This was assessed using the Edinburgh  
96 Post-partum Depression Scale (EPDS). The EPDS has been used extensively to screen depression  
97 in pregnant women and post-partum women. This scale meets both DSM-5 and ICD-10 diagnostic  
98 criteria for depression[13]. EPDS is a 10-question structured screening tool that can be  
99 administered to both pregnant women and women in the post-partum period. Ideally it should

100 be administered 4-6 weeks after delivery for the screening of post-partum depression. An EPDS  
101 score of greater than 11 is highly suggestive of a post-partum depression[13].

## 102 **Independent variables**

103 The following variables were evaluated for association with PPD: marital status  
104 (single/divorced, married); age (years); occupation (employed and unemployed); setting (urban  
105 or rural); religion (Muslim, Christian, atheists and others); level of education; the presence of  
106 comorbidities; past history of depression and other mental health illnesses; family history of  
107 depression/mental health illnesses; alcohol consumption; cigarette smoking; HIV infection  
108 status; mode of feeding (Breast milk only, artificial/mixed feeding); sleep difficulties and  
109 pregnancy outcome (live baby, still birth).

## 110 **Sample size calculation**

111 The sample size was obtained using the formula for estimation of a proportion since our  
112 major outcome was prevalence of post-partum depression.

$$113 \frac{[(Z_{crit})^2 P(1 - P)]}{D^2}$$

114 Where,

115 N = Number of participants

116 Z crit = the standard normal deviation, corresponding to a significance criterion of 0.05 (95), =  
117 1.960

118 D = Amount of error we will tolerate =  $\pm 6\%$

119 P = Pre-study estimate of the prevalence of post-partum depression

120 A pre-estimate value of P=23.4 % was used. This was in accordance with a study done in an urban  
121 setting in Cameroon, where about 23.4% of study participants presented with symptoms of  
122 depression on the PHQ-9 score [8].

123 
$$n = \frac{[(1.960)^2 0.23 * 0.77]}{(0.06)^2}$$

124 n = 188 participants.

## 125 **Statistical methods and data analysis**

126 Data were entered into an excel spreadsheet and analysed using Stata version 14  
127 statistical software. Results were presented as means and standard deviation (SD) for continuous  
128 variables and frequencies and percentages for categorical variables. At bivariate analysis, we  
129 used the Cochran-Mantel-Haenszel test to obtain crudes odd ratios (OR) of factors associated  
130 with PPD. Multivariate logistic regression was used to identify independent associations of PPD.  
131 This was presented as adjusted odds ratios(AOR). A p-value of <0.05 was used as cut off for  
132 statistical significance.

## 133 **Ethical considerations**

134 We obtained ethical clearance from the Ethical Review Board of the Regional Hospital of  
135 Bamenda prior to commencement of the study. All participants provided verbal or written  
136 consent before they were recruited into the study. Assent was obtained for participants below  
137 the age of 18 years.

## 138 **Results**

### 139 **Socio-demographic characteristics of participants**

140 A total number of 207 post-partum women took part in this study with a mean age of  
141 27.54 ± 5.78 years. Majority of the participants were employed (73.76%) and married (72.95%).  
142 Almost all participants reported the presence of sufficient social support (88.41%) or partner  
143 support (87.44%). Minority of participants reported the presence of gender-based violence  
144 (4.83%) and more than a third of them indicated some financial stress (36.10%). (Table 1).

145 **Table 1: Socio-demographic characteristics of Participants**

| Variables  | Mean ± SD    |  |
|------------|--------------|--|
| Age(years) | 27.54 ± 5.78 |  |

|                                   | <b>N</b> | <b>Percentage (%)</b> |
|-----------------------------------|----------|-----------------------|
| <b>Employment Status</b>          |          |                       |
| Unemployed                        | 53       | 26.24                 |
| Employed                          | 149      | 73.76                 |
| <b>Education</b>                  |          |                       |
| Primary                           | 88       | 42.51                 |
| Secondary                         | 64       | 30.92                 |
| Tertiary                          | 55       | 26.57                 |
| <b>Marital Status</b>             |          |                       |
| Single/ Divorced                  | 56       | 27.05                 |
| Married                           | 151      | 72.95                 |
| <b>Gender based violence</b>      |          |                       |
| Present                           | 10       | 4.83                  |
| Absent                            | 197      | 95.17                 |
| <b>Presence of social support</b> |          |                       |
| Present                           | 24       | 11.59                 |
| Absent                            | 183      | 88.41                 |
| <b>Supportive partner</b>         |          |                       |
| Present                           | 26       | 12.56                 |
| Absent                            | 181      | 87.44                 |
| <b>Sex of Baby</b>                |          |                       |
| Male                              | 116      | 56.59                 |
| Female                            | 89       | 43.41                 |
| <b>Financial stress</b>           |          |                       |
| Yes                               | 74       | 36.1                  |
| No                                | 131      | 63.9                  |

146

## 147 **Clinical characteristics of participants**

148 The mean gravidity of all participants was  $2.84 \pm 1.80$  pregnancies. The mean parity of all  
149 participants was  $2.63 \pm 1.53$  deliveries. The mean number of ANC visits attended was  $5.26 \pm 1.53$   
150 and the mean gestational age at the time of delivery was  $39.25 \pm 1.69$ . Majority of participants  
151 had a vaginal delivery (74.88%), had no post-partum complications (81.46%), were HIV negative  
152 (97.10%), had no family history of mental health conditions (92.17%). Almost all participants gave  
153 birth to live babies (94.20%) and chose exclusive breast feeding as the main mode of feeding  
154 (80.68%). (Table 2)

## 155 **Frequency of self-harm thoughts in participants**

156 A total number of 123 participants reported never having any self-harm thoughts while 24  
157 participants reported self-harm thoughts are sometimes common (Figure 1).

## 158 **Prevalence of depression amongst participants**

159 The prevalence of probable depression in participants was 31.8%. (Figure 2).

## 160 **Socio-demographic factors associated with depression**

161 At bivariate analysis, the presence of gender-based violence (OR:5.45, P = 0.001), financial  
162 stress (OR:3.88, P < 0.001), male baby (OR: 3.09, P < 0.001) were associated with post-partum  
163 depression. Presence of a supportive partner had a protective effect against post-partum  
164 depression (OR: 0.34, P = 0.01). (Table 2). After adjusting, Gender-based violence (OR: 4.67, P =  
165 0.013), financial stress (OR:3.57, P = 0.002) and male baby (OR: 2.83, P < 0.001). were  
166 independently associated with PPD (Table 2)

167 **Table 2: Clinical characteristics of participants**

| Variables                                        | Mean ± SD   |       |
|--------------------------------------------------|-------------|-------|
| <b>Number of pregnancies</b>                     | 2.84 ±1.80  |       |
| <b>Number of deliveries</b>                      | 2.63 ± 1.53 |       |
| <b>Number of ANC visits</b>                      | 5.26±1.53   |       |
| <b>Gestational age at time of delivery</b>       | 39.25±1.69  |       |
| <b>EPDS score</b>                                | 10.66 ±5.05 |       |
| <b>Mode of delivery</b>                          |             |       |
| Caesarean section                                | 52          | 25.12 |
| Vaginal delivery                                 | 155         | 74.88 |
| <b>History of depression</b>                     |             |       |
| Yes                                              | 19          | 9.18  |
| No                                               | 188         | 90.82 |
| <b>History of other mental health conditions</b> |             |       |
| Yes                                              | 3           | 1.48  |
| No                                               | 200         | 98.52 |



|                                         |     |       |
|-----------------------------------------|-----|-------|
| <b>Alcohol</b>                          |     |       |
| Yes                                     | 102 | 49.28 |
| No                                      | 105 | 50.72 |
| <b>Smoking</b>                          |     |       |
| Yes                                     | 6   | 2.9   |
| No                                      | 201 | 97.1  |
| <b>Post-partum complications</b>        |     |       |
| Present                                 | 38  | 18.54 |
| Absent                                  | 167 | 81.46 |
| <b>HIV infection</b>                    |     |       |
| Yes                                     | 6   | 2.9   |
| No                                      | 201 | 97.1  |
| <b>Pregnancy outcome</b>                |     |       |
| Still birth                             | 12  | 5.8   |
| Live baby                               | 195 | 94.2  |
| <b>Sleep difficulties</b>               |     |       |
| Yes                                     | 29  | 14.01 |
| No                                      | 178 | 85.99 |
| <b>Family history of mental illness</b> |     |       |
| Yes                                     | 16  | 7.73  |
| No                                      | 191 | 92.27 |
| <b>Mode of feeding</b>                  |     |       |
| Breast feeding only                     | 167 | 80.68 |
| Artificial feeding/Mixed                | 40  | 19.32 |

168

## 169 **Psycho-clinical factors associated with depression**

170 At bivariate analysis family history of mental illnesses (OR: 3.01, P = 0.02), alcohol  
 171 consumption (OR: 1.79, P = 0.04), smoking (OR: 4.48, P = 0.04) and previous history of depression  
 172 (OR:4.25, P = 0.002) were associated with PPD. Also, the analysis revealed that the absence of  
 173 sleep difficulties (OR:0.34, P = 0.001), and women who were already latched on (OR: 0.21, P =  
 174 0.02) were less likely to develop post-partum depression. Independent psycho-clinical factors of

175 post-partum depression include family history of mental health illness (OR: 4.34, P = 0.04) and  
 176 previous history of depression (OR: 4.17, P = 0.02). (Table 3)

177 **Table 3: Psycho-clinical characteristic associated with Depression**

| Variables                             |             | Crude ORs | P-value | Adjusted OR | P-value |
|---------------------------------------|-------------|-----------|---------|-------------|---------|
| Days of Post-partum                   | < = 7       | 0.95      | 0.8     | *           | *       |
|                                       | > 7         | 1         |         |             |         |
| No of ANC visits                      | < = 3       | 0.83      | 0.75    |             |         |
|                                       | >3          | 1         |         |             |         |
| Presence of Post-partum complications | Yes         | 1.2       | 0.73    | *           | *       |
|                                       | No          | 1         |         |             |         |
| Gravidity                             | <= 1        | 1.12      | 0.86    | *           | *       |
|                                       | > 1         | 1         |         |             |         |
| Parity                                | <= 1        | 0.97      | 0.95    | *           | *       |
|                                       | > 1         | 1         |         |             |         |
| Sleep difficulties                    | No          | 0.34      | 0.001   | 0.2         | 0.05    |
|                                       | Yes         | 1         |         |             |         |
| Family History of Mental disease      | Yes         | 3.02      | 0.02    | 4.34        | 0.04    |
|                                       | No          | 1         |         | 1           |         |
| Alcohol consumption                   | Yes         | 1.79      | 0.04    | 1.01        | 0.9     |
|                                       | No          | 1         |         |             |         |
| Smoking                               | Yes         | 4.48      | 0.04    | 1.9         | 0.1     |
|                                       | No          | 1         |         |             |         |
| History of mental health condition    | Yes         | 1.92      | 0.2     | *           | *       |
|                                       | No          | 1         |         |             |         |
| History of depression                 | Yes         | 4.25      | 0.002   | 4.17        | 0.02    |
|                                       | No          | 1         |         |             |         |
| Birth outcome                         | Life baby   | 2.44      | 0.25    | *           | *       |
|                                       | Still birth | 1         |         |             |         |
| Milk flowing                          | Yes         | 0.21      | 0.02    | 0.81        | 0.8     |
|                                       | No          | 1         |         |             |         |

178

179

180

## 181 Discussion

182 Depression is a common and debilitating complication of the postpartum period  
183 especially in Low and Middle-Income Countries (LMICS) where the burden of unmet  
184 psychological disturbances is underestimated. Abdollahi and Zarghami noted that women who  
185 experienced an episode of PPD suffered adverse outcomes years later; they were more likely to  
186 be depressed, suffer from chronic diseases, and scored higher on the general health  
187 questionnaire [14]. Similarly, the outcome of PPD in children has been well documented; they  
188 experience higher rates of behavioural problems, delayed cognitive and language development,  
189 poor academic grades, and depression later in life [15]. Thus, given the adverse long-term  
190 outcomes of PPD on both mother and child, it raises a major concern and calls for therapeutic  
191 action. The aim of this study was to determine the prevalence and factors associated with PPD  
192 among women attending post-natal clinic at the Tubah district hospital, North West Cameroon.

193 The prevalence of PPD in this study was 31.8%. This falls within the range of 4.0% - 63.9%  
194 reported by Arifin SRM et al [16] in postpartum mothers globally especially in Sub-Saharan Africa  
195 and the 6.9% to 50.3% obtained by Atuhaire et al [17] among mothers in Africa only. This rate is  
196 comparable 31.7% obtained by Hung et al in South Africa [18] and 33% by Chibanda et al in  
197 Zimbabwe [19]. However, this prevalence is higher than that reported by Nakku et al in Uganda  
198 (6.1%) [7], Anokye et al in Ghana (7%) [20], Adewuya et al in Nigeria (13.1%) [6], and Toru et al in  
199 Ethiopia (22.9%) [21]. The different tools used (SRQ-25, PH-9, ZSDS, and PHQ-9) could explain  
200 this variation. These tools are less specific and their use could extend to 12 months post-partum  
201 unlike the recommended 6 to 12 weeks for the EPDS[15].

202 On the contrary, the prevalence of PPD in our study was lower than that reported by  
203 Ghogomu et al, in Limbe Cameroon (61.8%) [9]. This disparity could be explained by the fact that  
204 his study was community-based and assessed mothers up to 12 months postpartum there by  
205 exposing the mothers to other risk factors of depression other than childbirth. Ideally, mothers  
206 should be screened for PPD one month postpartum or at 6 weeks [22]. It is worthy of note that

207 this study was done in the North West region of Cameroon which has suffered socio-political  
208 instability for over 5 years now. This has hindered access to healthcare by many and therefore  
209 the prevalence obtained in our study might be an underestimate of the actual situation. Hence,  
210 there is a need for more community-based studies in this era of socio-political instability to have  
211 a better appraisal of this major postpartum complication. In addition to socio-political instability,  
212 the ongoing Covid-19 pandemic might have also contributed to our higher rates of PPD, an  
213 observation shared elsewhere by Liang et al [23].

214 Financial stress was associated with PPD in our study. This is similar to findings reported  
215 by Djoda et al [8] and Ghogomu et al [9]. Participants who experienced gender-based violence  
216 were more likely to be depressed. This is congruent with findings reported in the literature [8–  
217 11]. The occurrence of PPD was high in those with a family history of mental illness. This is  
218 supported by findings from Stewart et al [11] and Neslihan et al [24]. Similarly, a history of  
219 maternal depression was associated with PPD in our study as was the case in the review by  
220 Neslihan et al [24].

221 Furthermore, the male gender was associated with PPD in our study. This is contrary to  
222 what Amr et al had in Saudi Arabia [25] as they found the birth of a female baby to be associated  
223 with PPD. This could be explained by the cultural differences in the study areas; Saudi Arabia is a  
224 predominantly muslim community where the birth of a male child is celebrated more than a  
225 female child. More so it is a patrilineal society where the issue of an heir is considered of great  
226 importance.

227 It is important to consider these results within the context of the study's limitations: The  
228 fact that it was a single centre hospital-based study may have influenced the highly selected  
229 group of participants. It may therefore be difficult to generalise the findings to the entire  
230 Cameroonian population. This could be improved by carrying out community-based studies and  
231 multicentre hospital-based studies. Also, the self-reported nature of the questionnaire and some  
232 elements of the EPDS scale leave room for recall bias and socially desirable responses. This score  
233 is a screening tool that validates the need for a psychiatrist to confirm the diagnosis which was

234 not done in our study. More so, the list of factors potentially associated with PPD as evaluated in  
235 this study is by no means exhaustive.

236 Despite these limitations, to the best of our literature search, this is the first study that  
237 provides evidence-based data on the prevalence and factors associated with PPD in a rural area  
238 in Cameroon. Whilst we envisage the scalability of this project, the observed high rates of PPD  
239 herein highlight the necessity for tailored pre- and post-partum counselling and monitoring from  
240 qualified personnel. However, the responsibility of ensuring a smooth post-partum transition  
241 does not entirely rest on healthcare professionals as evidence suggests good family/partner  
242 support is invaluable. This therefore calls for collective efforts if we are to curb the deleterious  
243 long-term effects of post-natal depression on the mother which will intend enhance proper  
244 growth and development of the newborn.

## 245 **Strengths and limitations**

246 The prevalence of PPD in urban Cameroon ranges from 23.4 to 61.8% in 2 previous studies.  
247 Psychosocial factors including unemployment, unsatisfactory support of baby, marital issues  
248 amongst others are associated with PPD. This study to the best of our knowledge this is the first  
249 study to determine the prevalence of PPD in a rural setting in Cameroon (31.8%) thus providing  
250 relevant evidence-based data which could help inform policy.

## 251 **Conclusion**

252 The prevalence of PPD was found to be 31.8% in a rural primary care centre population  
253 of childbearing women in Cameroon. The psycho-clinical factors associated with PPD were a  
254 family history of mental illness and a history of depression, while the social factors associated  
255 with PPD were gender-based violence, financial stress and having a male baby. These findings  
256 will be fundamental in designing antenatal and postnatal screening tools that will be used by  
257 health care providers to screen for these psycho-clinical and social factors to prevent PPD,  
258 disabling morbidity, and suicide in mothers.

## 259 **Competing interests**

260 The authors declare no competing interest

## 261 **Authors' contributions**

262 SNN and TND conceptualised the project and designed the protocol and questionnaires  
263 and participated in the writing of the article. NCN ran the analysis of the collected data and wrote  
264 certain sections of the article. CA, ET, MB, JON, LAST and CSB contributed to the write-up of the  
265 different sections of the article. All authors read and approved the final copy of the manuscript

## 266 **Acknowledgements**

267 Our sincere gratitude goes to all the staff of the TDH Maternity and the midwives who  
268 helped immensely with the data collection of this study. In addition to previous psychosocial  
269 factors described in the literature, our study found out that women who had a male baby had  
270 higher odds of having PPD

271

272

## REFERENCES

- 273 1. Nynas J, Narang P, Kolikonda MK, Lippmann S. Depression and Anxiety Following Early  
274 Pregnancy Loss. *Prim Care Companion CNS Disord*. 2015 Jan 29;
- 275 2. Miller LJ. Postpartum depression. Vol. 287, *Journal of the American Medical Association*.  
276 American Medical Association. 2002; 762–5.
- 277 3. Roshaidai Mohd Arifin S, Cheyne H, Maxwell M. Review of the prevalence of postnatal  
278 depression across cultures. *AIMS Public Heal*. 2018;5(3):260–95.
- 279 4. B IE, EA OL, S MM-M. [Postpartum depression in Kinshasa (DR Congo): prevalence and  
280 risk factors]. *Med Sante Trop*. 2012; 22(4):379–84.
- 281 5. Cooper PJ, Tomlinson M, Swartz L, Woolgar M, Murray L, Molteno C. Post-partum  
282 depression and the mother-infant relationship in a South African peri-urban settlement.  
283 *Br J Psychiatry [Internet]*. 1999;175(6):554–8.
- 284 6. AO A. Early postpartum mood as a risk factor for postnatal depression in Nigerian  
285 women. *Am J Psychiatry [Internet]*. 2006;163(8):1435–7.
- 286 7. Nakku JE, Nakasi G, Mirembe F. Postpartum major depression at six weeks in primary  
287 health care: prevalence and associated factors. *Afr Health Sci*. 2006 Dec; 6(4):207.
- 288 8. Adama ND, Foumane P, Olen JPK, Dohbit JS, Meka ENU, Mboudou E. Prevalence and Risk  
289 Factors of Postpartum Depression in Yaounde, Cameroon. *Open J Obstet Gynecol*  
290 *[Internet]*. 2015 Sep 14; 05(11):608–17.
- 291 9. Ghogomu G, Halle-Ekane G, Nde P, Palle J, Atashili J, Mangala F, et al. Prevalence and  
292 Predictors of Depression among Postpartum Mothers in the Limbe Health District,  
293 Cameroon: A Cross-Sectional Study. *Br J Med Med Res*. 2016 Jan 10;12(3):1–11.
- 294 10. Gelaye B, Rondon M, Araya PR, Williams PMA. Epidemiology of maternal depression, risk  
295 factors, and child outcomes in low-income and middle-income countries. *The lancet*  
296 *Psychiatry*. 2016 Oct 1;3(10):973.
- 297 11. Stewart DE, Robertson FE, Dennis C-L, Grace SL, Wallington T. Postpartum depression:  
298 literature review of risk factors and interventions. 2003;
- 299 12. Myers S, Johns SE. Postnatal depression is associated with detrimental life-long and  
300 multi-generational impacts on relationship quality. *PeerJ*. 2018 Feb 16;6(2):e4305.
- 301 13. Smith-Nielsen J, Matthey S, Lange T, Væver MS. Validation of the Edinburgh Postnatal  
302 Depression Scale against both DSM-5 and ICD-10 diagnostic criteria for depression. *BMC*  
303 *Psychiatry*. 2018 Dec 20;18(1):1–12.
- 304 14. Abdollahi F, Zarghami M. Effect of postpartum depression on women’s mental and

- 305 physical health four years after childbirth. *East Mediterr Heal J.* 2018 Oct 1;24(10):1002–  
306 9.
- 307 15. E N, RM P, L M, P C, MG C, A S. Association of Persistent and Severe Postnatal Depression  
308 With Child Outcomes. *JAMA psychiatry.* 2018 Mar 1; 75(3):247–53.
- 309 16. SRM A, H C, M M. Review of the prevalence of postnatal depression across cultures.  
310 *AIMS public Heal.* 2018;5(3):260–95.
- 311 17. Atuhaire C, Brennaman L, Cumber SN, Rukundo GZ, Nambozi G. The magnitude of  
312 postpartum depression among mothers in Africa: a literature review. *PAMJ* 2020; 3789.  
313 2020 Sep 25; 37(89):1–11.
- 314 18. Hung KJ, Tomlinson M, Roux IM le, Dewing S, Chopra M, Tsai AC. Community-based  
315 prenatal screening for postpartum depression in a South African township. *Int J Gynaecol*  
316 *Obstet [Internet].* 2014 [cited 2021 Nov 5];126(1):74.
- 317 19. D C, W M, M T, G W, S R, L S-C, et al. Postnatal depression by HIV status among women in  
318 Zimbabwe. *J Womens Health (Larchmt) [Internet].* 2010 Nov 1 [cited 2021 Nov  
319 5];19(11):2071–7.
- 320 20. Anokye R, Acheampong E, Budu-Ainooson A, Obeng EI, Akwasi AG. Prevalence of  
321 postpartum depression and interventions utilized for its management. *Ann Gen*  
322 *Psychiatry.* 2018 May 9;17(1):1–8.
- 323 21. Toru T, Chemir F, Anand S. Magnitude of postpartum depression and associated factors  
324 among women in Mizan Aman town, Bench Maji zone, Southwest Ethiopia. *BMC*  
325 *Pregnancy Childbirth.* 2018 Nov 14;18(1):1–7.
- 326 22. Sit DK, Wisner KL. The Identification of Postpartum Depression. *Clin Obstet Gynecol.*  
327 2009 Sep;52(3):456.
- 328 23. Liang P, Wang Y, Shi S, Liu Y, Xiong R. Prevalence and factors associated with postpartum  
329 depression during the COVID-19 pandemic among women in Guangzhou, China: a cross-  
330 sectional study. *BMC Psychiatry.* 2020 Nov 25;20(1):1–8.
- 331 24. NK Ö, NE B, H D. Postpartum Depression Prevalence and Risk Factors in Turkey: A  
332 Systematic Review and Meta-Analysis. *Arch Psychiatr Nurs.* 2017 Aug 1;31(4):420–8.
- 333 25. Amr M, Balaha M, Al Moghannum M. Postpartum Mental Health among Young Women.  
334 *Online J Heal Allied Sci.* 2012 Jan 15;10(4):6.
- 335
- 336



# Frequency of self-thoughts, N= 207

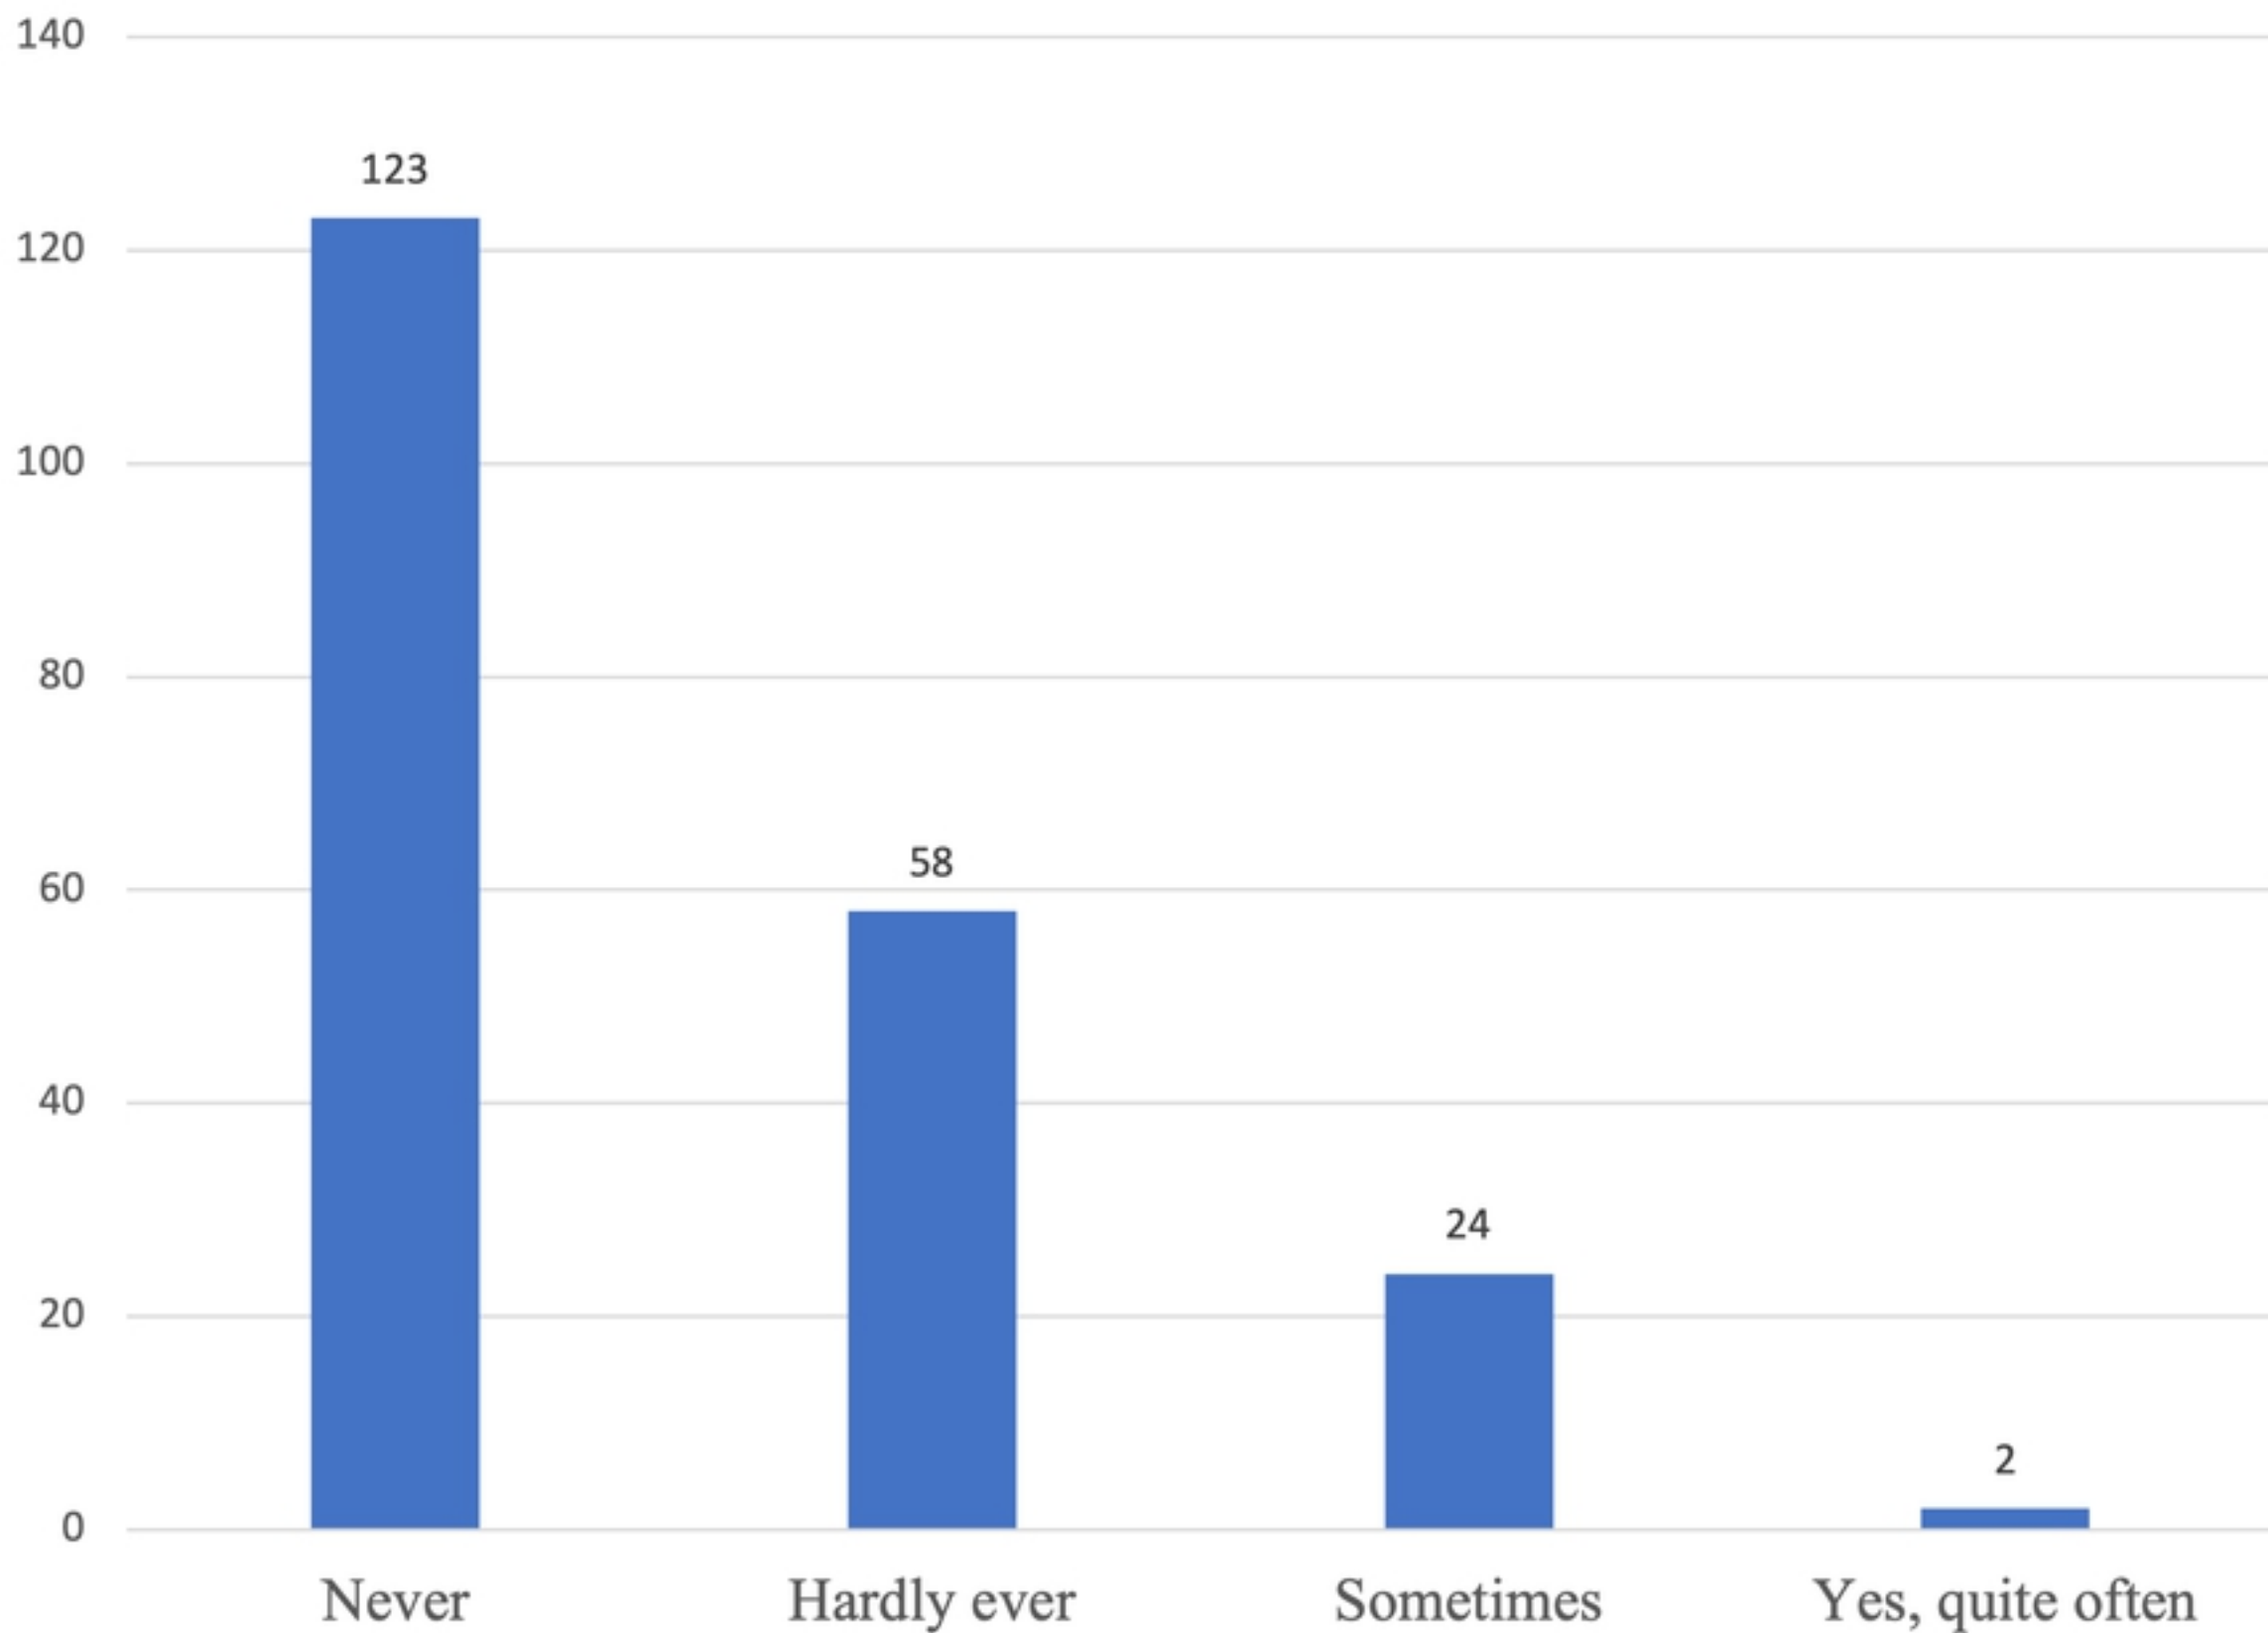

Figure 1

## Percentage

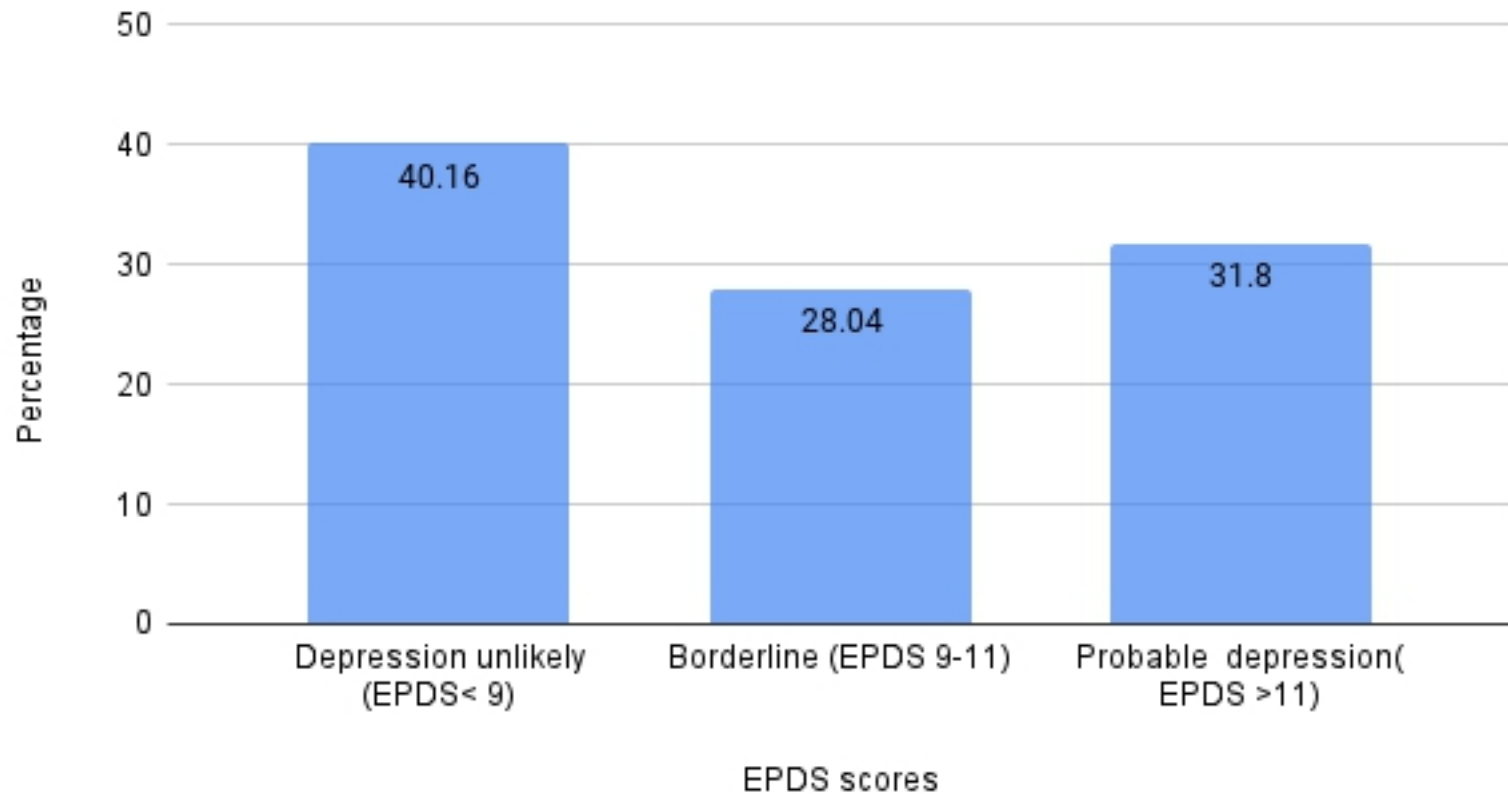

Figure 2
